# Supplementary material for: Effect of Heating Rate on the Photocatalytic Activity of Ag–TiO2 Nanocomposites by One-Step Process via Aerosol Routes
Source: MDPI journal article supplement (doi:10.3390/catal12010017), 2021-12-24
Supplement: s1 [file s1]

Archive with 1 entries (1 files):
- catalysts-1502508-supplementary.pdf
