# Supplementary material for: Effect of Heating Rate on the Photocatalytic Activity of Ag–TiO2 Nanocomposites by One-Step Process via Aerosol Routes
Source: MDPI journal article supplement (doi:10.3390/catal12010017), 2021-12-24
Supplement: s1 [file s1 › catalysts-1502508-supplementary.pdf]

## SUPPLEMENTARY MATERIALS

### *Effect of heating rate on the photocatalytic activity of Ag–TiO<sub>2</sub> nanocomposites by one-step process via aerosol routes*

K. Kusdianto<sup>1</sup>, Meditha Hudandini<sup>2</sup>, Dianping Jiang<sup>3</sup>, Masaru Kubo<sup>2</sup>, Manabu Shimada<sup>\*2</sup>

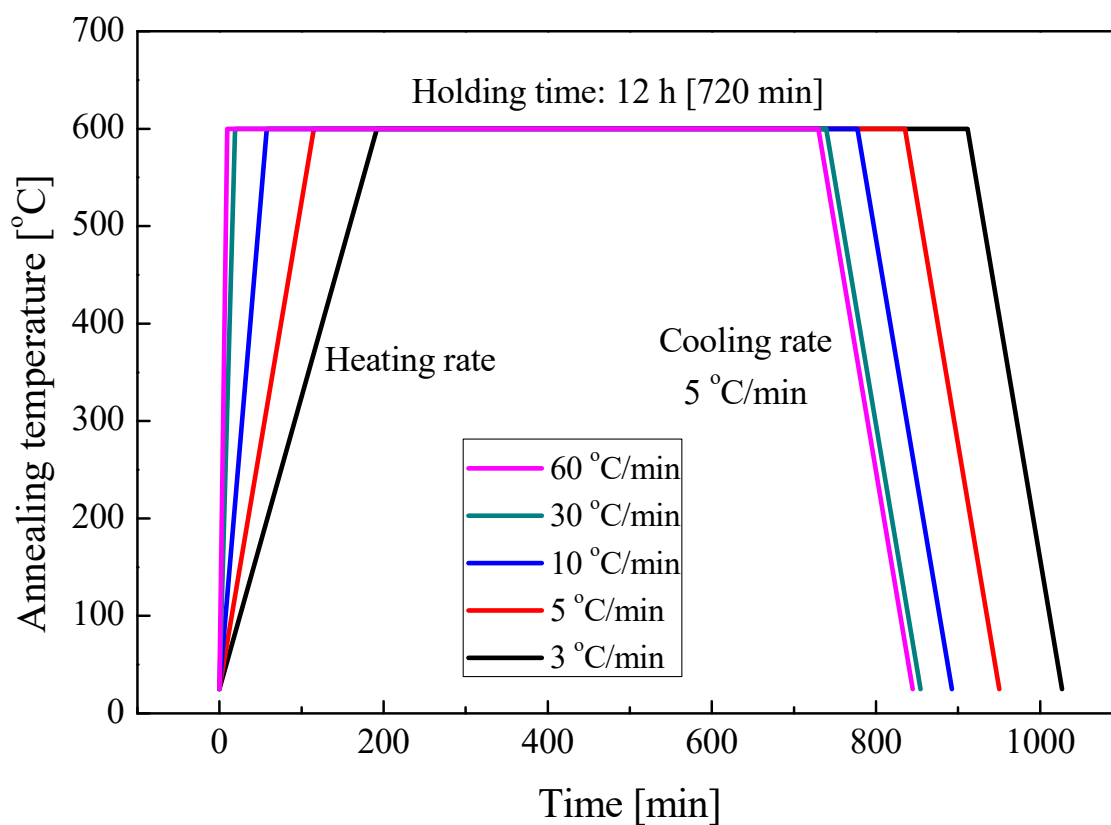

**Figure S1:** Schematic of the effect of heat-treatment processes on the fabricated nanocomposite films at different heating rates.

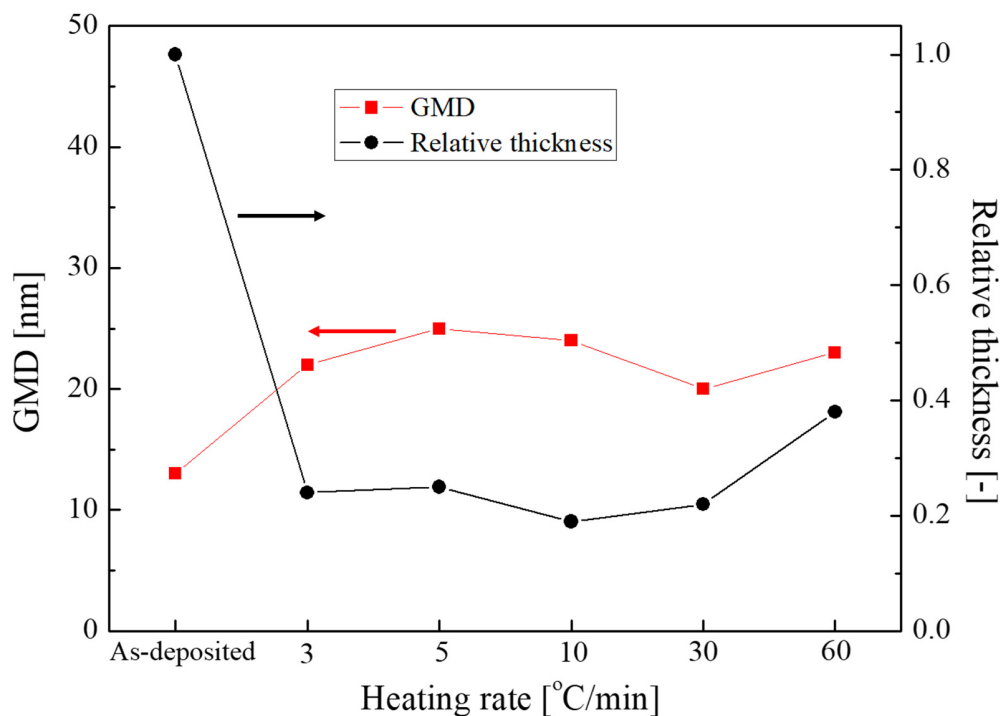

**Figure S2:** Geometric mean diameter (GMD) and relative thickness of the nanocomposite particles after annealing at 600 °C at different heating rates from 3 to 60 °C/min including those of the as-deposited film.

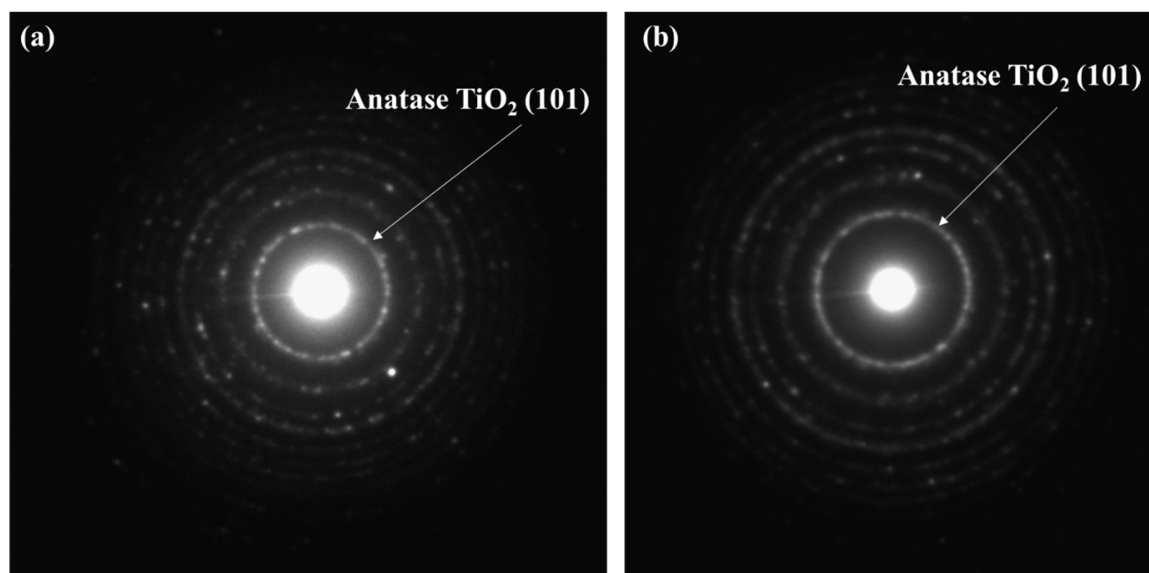

**Figure S3:** Selected-area electron diffraction (SAED) patterns of the Ag-TiO<sub>2</sub> nanocomposite films after annealing at 600 °C at heating rates of 5 °C/min (a) and 60 °C/min (b). The diffraction peak of anatase (101) is the dominant phase of the nanocomposite films.

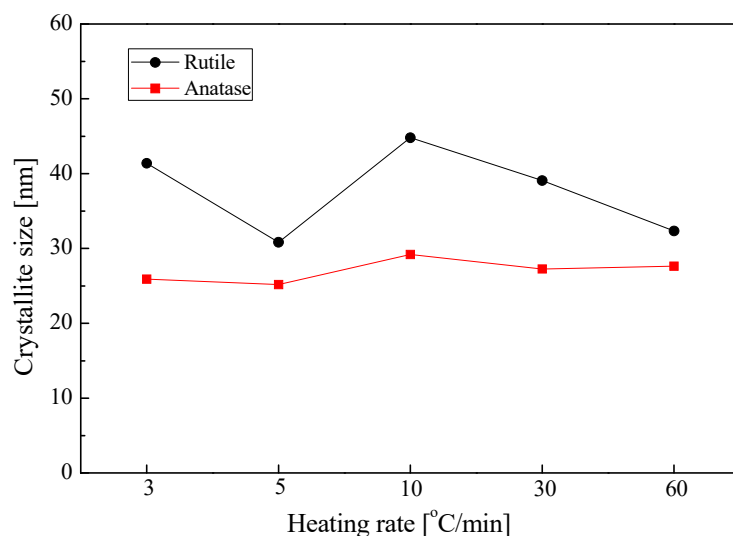

**Figure S4:** Crystallite size of anatase and rutile of the Ag-TiO<sub>2</sub> nanocomposite films after annealing at 600 °C at different heating rates. The average crystallite sizes of anatase and rutile were estimated by the Scherrer equation based on the diffraction peaks of anatase (101) and rutile (110), respectively.

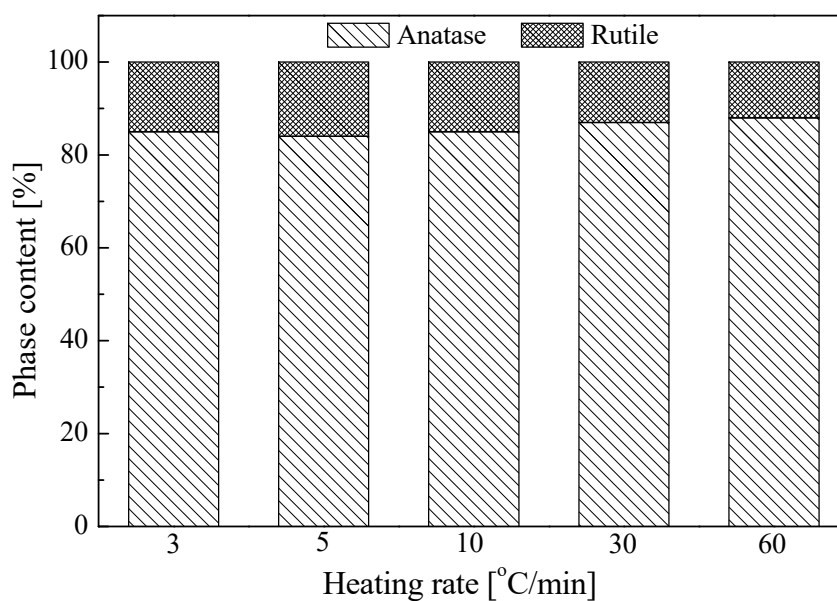

**Figure S5:** Phase content of anatase and rutile of the Ag-TiO<sub>2</sub> nanocomposite films after annealing at 600 °C at different heating rates. The phase content of anatase and rutile was estimated using Eq. 3 (shown in the manuscript) based on the diffraction peaks of anatase (101) and rutile (110), respectively.

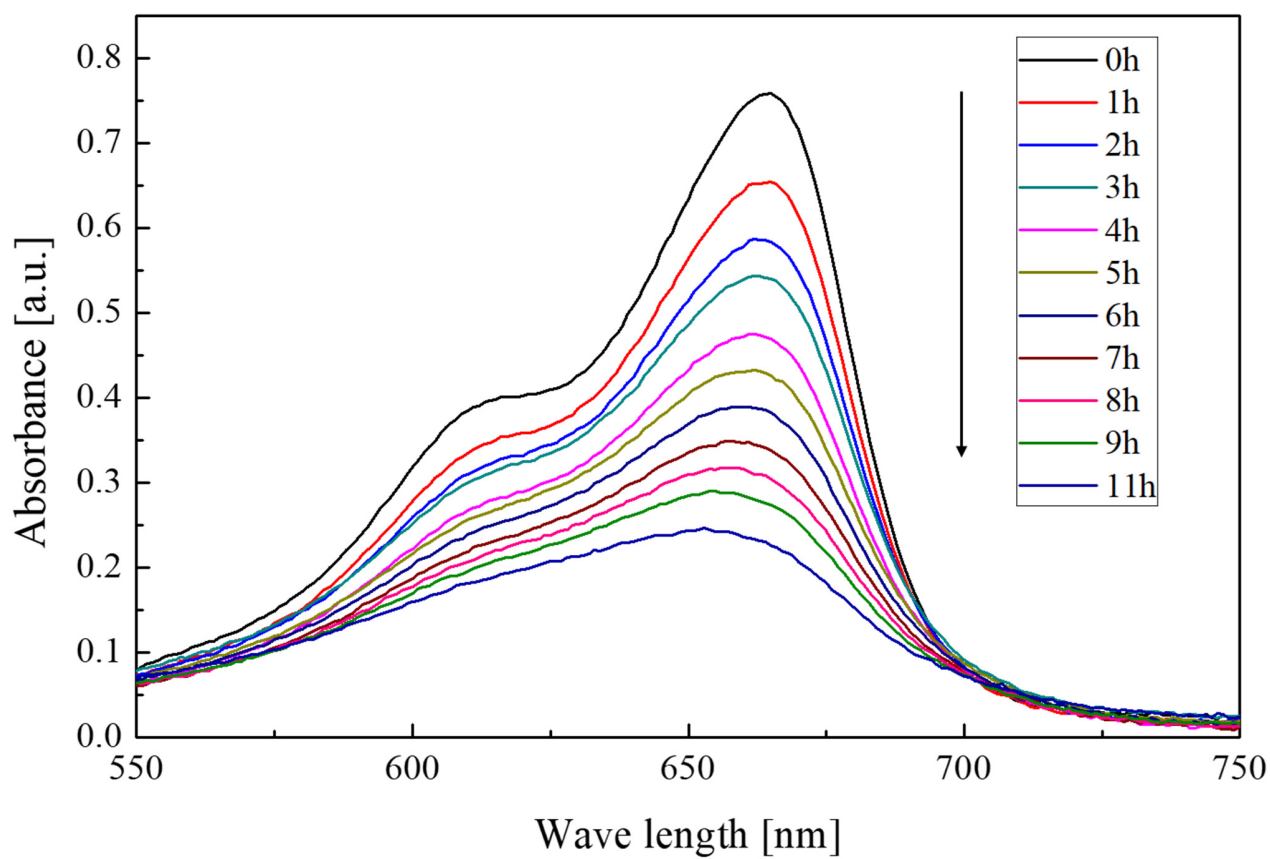

**Figure S6:** UV-vis absorption of a 2 mg/L methylene blue (MB) aqueous solution under UV light irradiation in the presence of the Ag-TiO<sub>2</sub> nanocomposite film after an annealing temperature and heating rate of 600 °C and 60 °C/min, respectively.

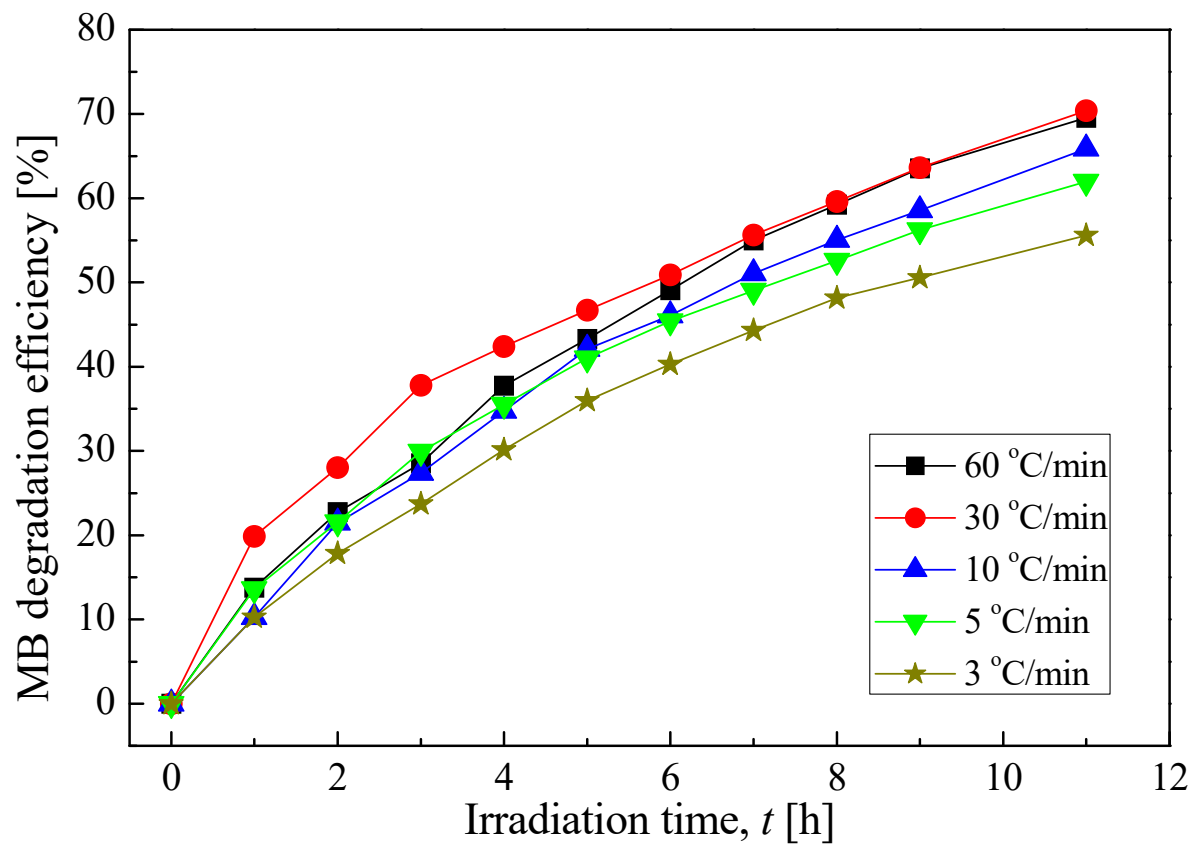

**Figure S7:** MB degradation efficiency (MDE) of the Ag-TiO<sub>2</sub> nanocomposite films after annealing at 600 °C at different heating rates (3-60 °C/min). MDE was calculated using Eq. 4 (shown in the manuscript).
